# Supplementary material
Source: Springer Nature journal article supplement (https://www.springermedizin.de/resource/supplementary/13014_2013_1203_MOESM1_ESM.pdf/9634828)

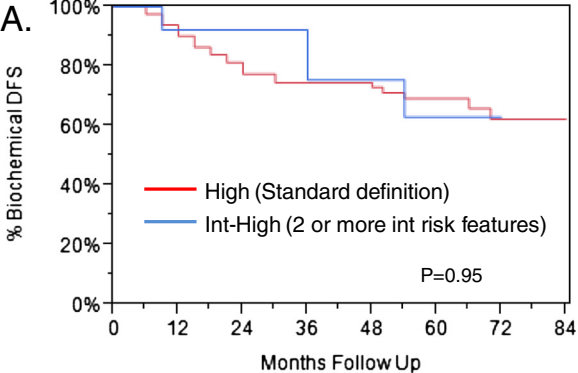

|          |    |    |    |    |    |    |    |   |
|----------|----|----|----|----|----|----|----|---|
| High     | 82 | 76 | 63 | 51 | 48 | 36 | 17 | 1 |
| Int High | 14 | 13 | 12 | 11 | 8  | 5  | 1  |   |

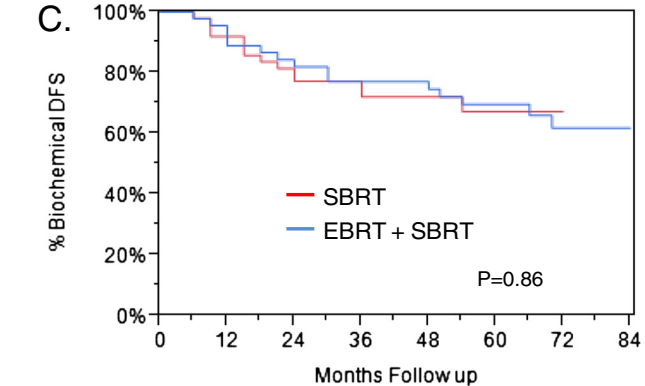

|             |    |    |    |    |    |    |    |
|-------------|----|----|----|----|----|----|----|
| SBRT        | 51 | 45 | 38 | 30 | 25 | 14 | 3  |
| EBRT + SBRT | 45 | 43 | 36 | 32 | 31 | 27 | 15 |

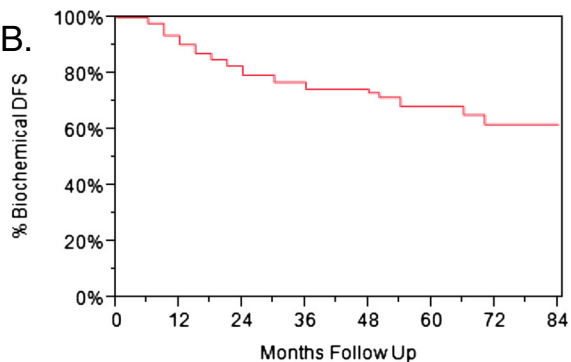

|         |    |    |    |    |    |    |    |
|---------|----|----|----|----|----|----|----|
| At Risk | 96 | 88 | 74 | 62 | 56 | 41 | 18 |
|---------|----|----|----|----|----|----|----|

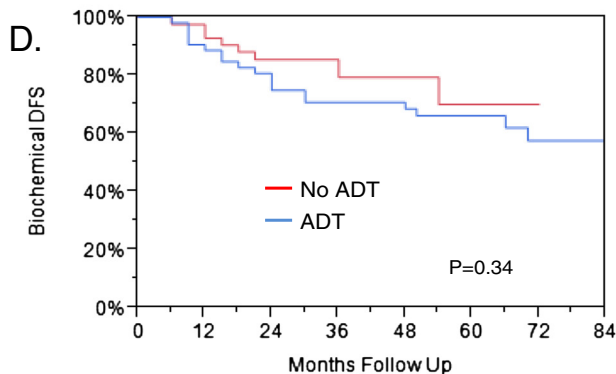

|        |    |    |    |    |    |    |    |
|--------|----|----|----|----|----|----|----|
| No ADT | 42 | 41 | 33 | 28 | 23 | 14 | 5  |
| ADT    | 54 | 47 | 41 | 34 | 33 | 27 | 13 |

Supplement: MOESM1 [file 9634828]
